# Supplementary material for: Hierarchical regulation of the genome: global changes in nucleosome organization potentiate genome response
Source: PubMed Central journal article supplement (PMC4872727; doi:10.18632/oncotarget.6841), 2016-01-07
Supplement: oncotarget-07-6460-s001.pdf [file oncotarget-07-6460-s001.pdf]

# Hierarchical regulation of the genome: global changes in nucleosome organization potentiate genome response

## Supplementary Material

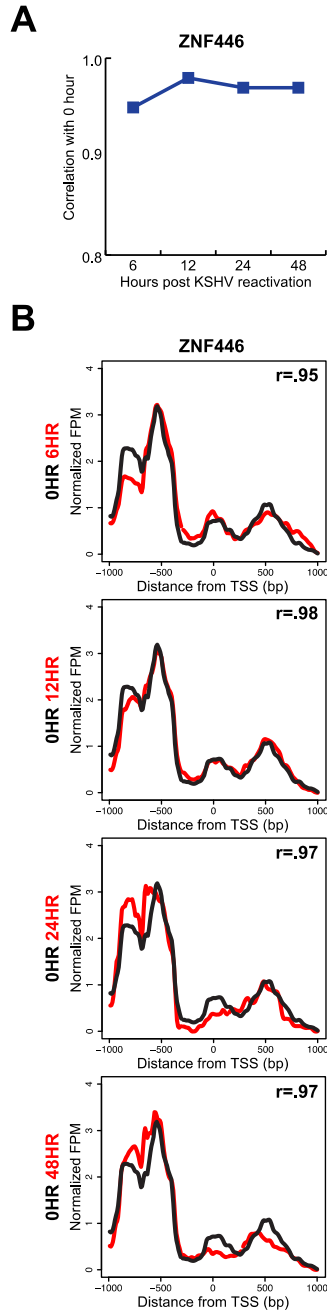

**Supp. Fig. 1.** (A) The correlation values between 0 hours and the reactivated state's timepoints nucleosome distribution for ZNF446. (B) The nucleosome distributions of the latent (black line) and reactivated KSHV time points (red lines) for ZNF446. The x-axis represents genomic position showing two kb centered on a TSS. The y-axis is the normalized reads per million.

**A**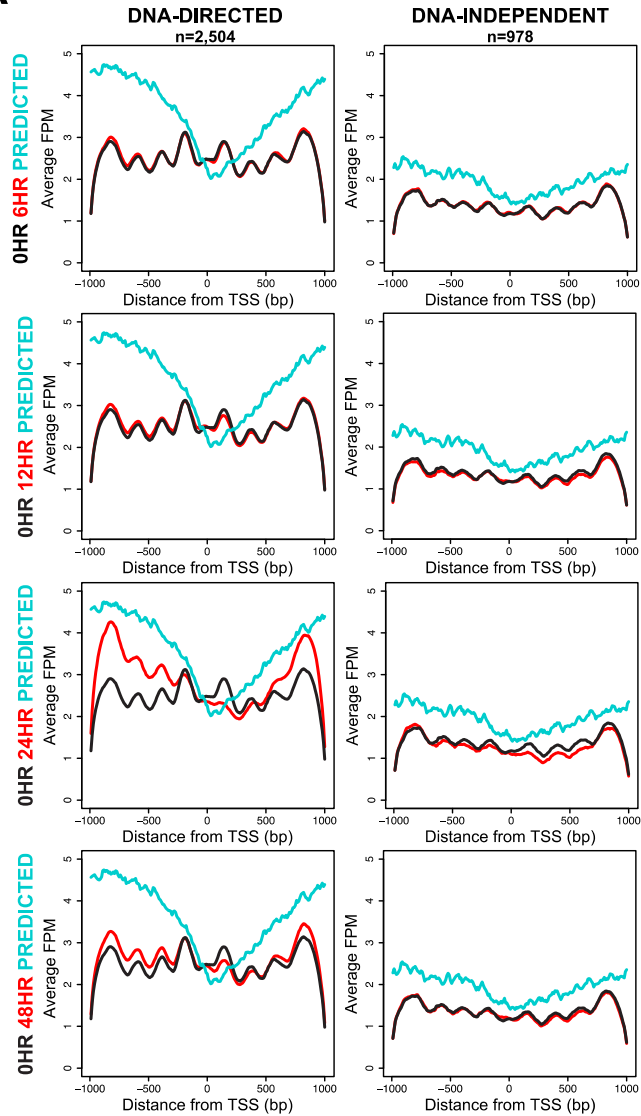

**Supp. Fig. 2.** Average plots for the 2kb surrounding the TSSs of the genes identified as DNA-directed (n=2,504) and DNA-independent (n=978) for 0 hour (black line), reactivated timepoints (red lines), and predicted (cyan line). The y-axis is the average midpoints per million, and the x-axis is the 2kb surrounding the TSSs of all genes classified as DNA-directed and DNA-independent.

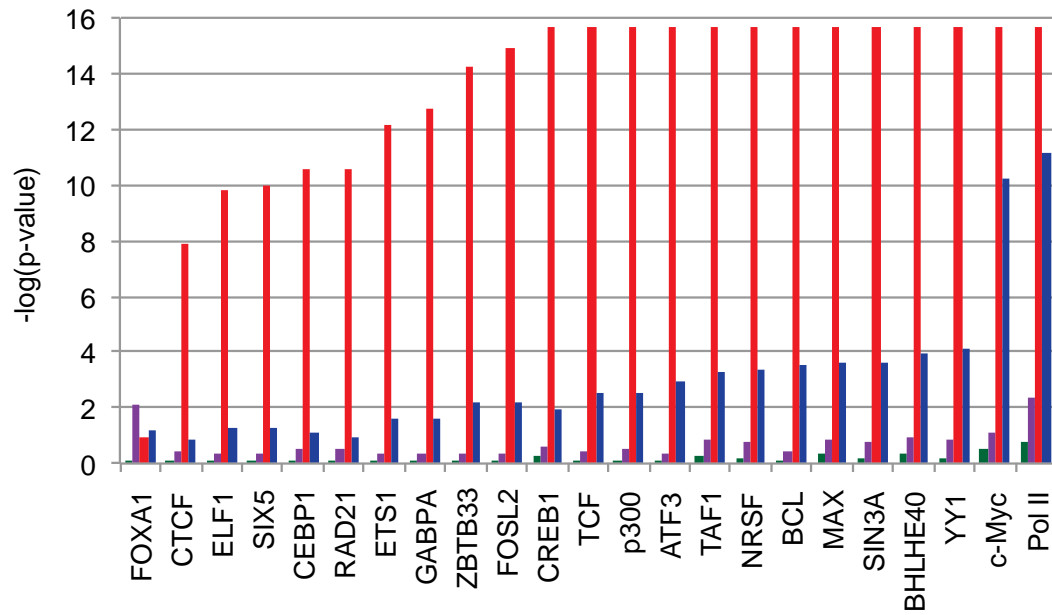

**Supp. Fig. 3.** -log of the p-values for the subnucleosomal fragments at A549 regulatory factor binding sites (2011) for 6, 12, 24, and 48 hour timepoints (green, purple, red, and blue respectively) compared to 0 hours.

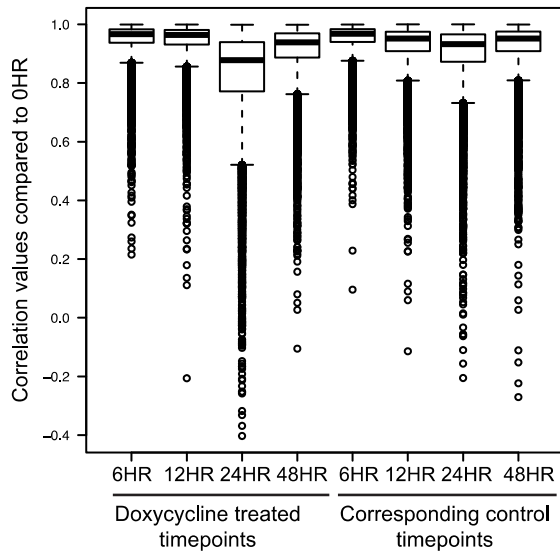

**Supp. Fig. 4.** Boxplot of correlation values for each TSS between iSLK.219 0 hour and iSLK.219 cell line 6, 12, 24, an 48 hours post doxycycline treatment and control iSLK .219 cell line corresponding timepoints. The y-axis is correlation values of the sample with iSLK.219 0 hour.

Supp. Table 1

**Supp. Table 1.** Loci classified with changes in nucleosome distributions, DNA-directed, and DNA-independent at 24 hour timepoint.

| <b>LOCI WITH NUCLEOSOME REDISTRIBUTIONS AT 24 HR TIMEPOINT</b> |                             |
|----------------------------------------------------------------|-----------------------------|
| <b>DNA-Directed loci</b>                                       | <b>DNA-independent loci</b> |
| PUS10                                                          | NDUFA7                      |
| CSTF3                                                          | EXO5                        |
| ZKSCAN3                                                        | MAGEA1                      |
| KRTAP19-3                                                      | CCDC176                     |
| MRPL33                                                         | B3GNTL1                     |
| OR56B4                                                         | FAM205A                     |
| AP2B1                                                          | AKR7L                       |
| KRT10                                                          | NID2                        |
| MITD1                                                          | P2RY12                      |
| CSTF3-AS1                                                      | KIAA1984                    |
| VTA1                                                           | LINC00922                   |
| MRPL30                                                         | FAM46D                      |
| NUP35                                                          | SNORD116-16                 |
| THADA                                                          | BANF2                       |
| OR14J1                                                         | PLAT                        |
| OR5L2                                                          | POSTN                       |
| ITPK1-AS1                                                      | LAIR2                       |
| PCDHB7                                                         | CHRM2                       |
| CDKL3                                                          | MIR376A1                    |
| DGUOK                                                          | LDLRAD3                     |
| IL22                                                           | CHAD                        |
| CHMP2B                                                         | HSD17B13                    |
| MIR520C                                                        | ADIG                        |
| SPC25                                                          | C9orf57                     |
| EDC3                                                           | GBP7                        |
| CCDC172                                                        | ZFYVE16                     |
| OR56A1                                                         | LOC388948                   |
| BEND3P3                                                        | GRID2                       |
| MIR3194                                                        | GABPB1                      |
| OR5L1                                                          | FLJ42627                    |
| HELB                                                           | MIR2392                     |

|              |              |
|--------------|--------------|
| TTC14        | MCM2         |
| CLDN10-AS1   | CCR5         |
| APTX         | WTAPP1       |
| LCE4A        | SHPRH        |
| PEX13        | ARHGAP18     |
| MAGED2       | SRD5A3       |
| MAGEB3       | TNFRSF11B    |
| ZBTB41       | DEFB105A     |
| TCEANC       | LOC728819    |
| LINC00189    | SNORD115-2   |
| OXNAD1       | HCAR1        |
| SPIN2B       | CYP2C8       |
| ZUFSP        | LGALS9B      |
| VTRNA1-1     | LOC100506343 |
| GLIS3-AS1    | RXFP1        |
| LOC100288198 | MRPL20       |
| CLEC4D       | CASP8        |
| NUDT15       | GPR50        |
| LOC100133957 | ITLN1        |
| ERLIN2       | IFT122       |
| COLQ         | HPYR1        |
| PTTG3P       | EVI2A        |
| LINC00242    | URB2         |
| SNORD116-29  | ACE2         |
| FAM170B-AS1  | REC8         |
| SGOL2        | LHX8         |
| SMARCAL1     | HIST1H2BO    |
| FAM71C       | SLC44A5      |
| OR4K1        | SMAD6        |
| KRTAP13-2    | CASR         |
| OR2AK2       | PRAC         |
| ZNF268       | LHFPL1       |
| MRPL17       | ABCB5        |
| MRPS36       | MAPT-IT1     |
| C9orf3       | CFI          |
| BMP10        | GAD2         |
| GLIPR1L1     | HCG17        |
| UXT          | LOC388849    |
| OR51M1       | BHLHE41      |
| TMEM67       | OR6C6        |
| ZNF138       | CYP19A1      |

|              |              |
|--------------|--------------|
| LOC100616530 | GLP2R        |
| OR10T2       | SNORD115-14  |
| POLR3A       | LOC154449    |
| ANKRD49      | MIR1203      |
| TMEM230      | HIST1H2AM    |
| LOC151171    | C11orf80     |
| OR5AR1       | CLSPN        |
| CDK15        | PKIB         |
| C18orf54     | MIR5705      |
| OR2M4        | SRMS         |
| ETS1         | ZNF607       |
| RBM12B-AS1   | SLC24A2      |
| DBIL5P2      | SLC35G5      |
| OR10K1       | LOC100505835 |
| CCT4         | MIR1184-3    |
| TTK          | SSR4P1       |
| ZNF784       | SRXN1        |
| GPR52        | GEMIN7       |
| KRTAP19-5    | MIR767       |
| CLVS1        | MIR380       |
| CA5BP1       | PSKH2        |
| SPZ1         | MAPT-AS1     |
| OR52N4       | IL1RN        |
| SNORD50B     | CARD6        |
| LINC00888    | MBD4         |
| MRPL44       | MIR3909      |
| TMPRSS3      | ABLIM3       |
| MRE11A       | RCAN2        |
| MMP13        | SNORA59B     |
| SLC7A11      | LINC00442    |
| MIR548H3     | TTC1         |
| RWDD1        | GREB1        |
| KRTAP1-1     | MIR3200      |
| MIR4465      | RPL23AP82    |
| VPS41        | CNR2         |
| KIF18A       | RNU6-28P     |
| ADH7         | LOC401134    |
| OR8H3        | SLAMF9       |
| PCDHB5       | MIR4524A     |
| UTP6         | MIR19B2      |
| CXorf61      | TUBGCP5      |

|           |              |
|-----------|--------------|
| LAMA4     | NBEA         |
| DHRS7B    | HAR1A        |
| MIR5581   | SEC14L6      |
| SYNPO2    | MIR4524B     |
| CYSLTR2   | ASPDH        |
| FILIP1L   | CLEC4A       |
| NDUFAF4P1 | SHC2         |
| LINC00467 | ASPRV1       |
| ZNF780A   | TBC1D3P5     |
| MIR4795   | PLAC8L1      |
| OAS1      | DDX25        |
| RNF20     | GLIS2        |
| KRTAP7-1  | PWP2         |
| YY2       | OBP2B        |
| SPTLC1    | FOXF1        |
| MORF4L2   | MIR503       |
| CEPT1     | ATP2B3       |
| MIR3157   | ADAM1A       |
| ZBTB6     | TAS2R16      |
| GDAP1     | PHB          |
| MIR4781   | NAGA         |
| DEFB126   | DBR1         |
| HMG3      | SULT1A2      |
| TMEM232   | SCN11A       |
| PNPLA8    | KRTAP1-4     |
| ZNF431    | ST18         |
| MORC2     | PRL          |
| FAM124B   | EGFLAM-AS4   |
| YIPF6     | KLK9         |
| ALG10     | PPP1R1B      |
| C5orf51   | TRIM56       |
| HIST4H4   | SLC26A5      |
| LINC00636 | PCYT1B       |
| IPO4      | MIR1178      |
| SULF1     | TWIST1       |
| FAM127C   | PIN4P1       |
| MED23     | LOC100506422 |
| CSTF2     | GK2          |
| ADAT1     | SCARNA3      |
| SULT6B1   | FIS1         |
| ACY3      | LOC100506233 |



|             |              |
|-------------|--------------|
| METTL2B     | LOC100505768 |
| METTL15     | LINC00898    |
| TMA16       | PLIN5        |
| OR13C3      | IL20         |
| WDR70       | GGT8P        |
| DPH3        | UBL3         |
| MIR4633     | NAPSA        |
| RANBP6      | SERPINF2     |
| SLC22A24    | HIF1AN       |
| OR8A1       | TMEM194B     |
| KLB         | SNORD115-24  |
| ZSCAN5A     | MIR300       |
| SLC7A9      | FAM83G       |
| HIST1H1D    | C4orf26      |
| HARS2       | CISH         |
| NDUFS4      | SLX4IP       |
| MIR4255     | ING2         |
| SNORD116-26 | APOL2        |
| OR5P2       | AADAC        |
| OR2G3       | MIR507       |
| MTFR2       | GPT          |
| LYZL2       | ZNF445       |
| ANXA2P3     | TRAK1        |
| ZSCAN12     | SLC13A2      |
| CCDC132     | ZNF610       |
| LUM         | RNU6-76P     |
| TXNRD3NB    | ABCA6        |
| FANCD2      | MIR125B2     |
| HARS        | MT1F         |
| LOC401320   | MIR487B      |
| ABCC5-AS1   | CLEC11A      |
| LDHA        | LOC157273    |
| PAK1IP1     | WDR64        |
| CCR8        | OR2H1        |
| GSTTP1      | ESRRG        |
| DNAJC2      | MIR502       |
| SFI1        | MIR501       |
| LINC00202-1 | LOC100506124 |
| BASP1P1     | RPS28        |
| LINC00864   | MIR1264      |
| MMP1        | CA14         |

|              |              |
|--------------|--------------|
| KLHL41       | PDPR         |
| ART3         | TMEM52B      |
| INTU         | LOC100506123 |
| MYBPC1       | SLC32A1      |
| PEX11A       | MUC5B        |
| NDUFA5       | MIR363       |
| C12orf4      | GZMM         |
| TSNAX        | ZNF497       |
| OR8H2        | FLJ23867     |
| LEMD3        | SNORD116-2   |
| MC2R         | C16orf98     |
| ST6GALNAC5   | OR2A7        |
| KRTAP21-2    | ABHD4        |
| CDH12        | SNORD88C     |
| LRP2BP       | DDO          |
| HCCAT5       | HIST1H2BM    |
| LIPT1        | MRPL3        |
| WDR93        | TMEM174      |
| SEC24C       | CHST5        |
| LOC100130298 | GPR84        |
| KIFAP3       | PADI6        |
| PAPD4        | CA10         |
| PYROXD1      | SNORA29      |
| IARS         | MARCKS       |
| ANKRD30BP2   | MGC27345     |
| METTL2A      | SH2B2        |
| KRTAP6-3     | SNORD115-35  |
| NUP43        | MIR5688      |
| PRPS1L1      | ZNF733P      |
| UNC13C       | KIAA1211     |
| BTBD8        | ZNF534       |
| GTPBP8       | MAP3K14      |
| IFT74        | SMCR7L       |
| GPR15        | SNORD114-12  |
| DNAJB13      | GPR148       |
| ZNF780B      | ASB2         |
| OR4L1        | C8orf4       |
| RAB3GAP2     | GBP4         |
| DYNC2H1      | ACTRT2       |
| COX15        | CDRT15       |
| KIAA0101     | TOPAZ1       |

|            |              |
|------------|--------------|
| RBM41      | OR51G1       |
| RPL39L     | LOC400940    |
| CCDC181    | USP6         |
| ZNF92      | RACGAP1P     |
| ZNF714     | ARHGDIB      |
| ENTPD1-AS1 | TIMD4        |
| GFM1       | VSTM2A       |
| SATB1      | ELFN2        |
| LLPH       | HAGHL        |
| MNAT1      | ZNF540       |
| ELP3       | TFPI         |
| LOC145474  | SNORA70B     |
| MIR1284    | MIR561       |
| TRIM55     | TCP10L2      |
| NALCN-AS1  | MIR1324      |
| ANO4       | RAB3C        |
| FAM172A    | C1QC         |
| SNORD115-1 | CLCA4        |
| CLDN16     | SCG5         |
| ARMCX1     | MIR1245A     |
| REG1A      | MIR5685      |
| TCEANC2    | S100A7A      |
| BET1       | IMPG2        |
| PTTG1      | LOC643441    |
| OR1D2      | MIR1245B     |
| RAB5A      | IFIT1B       |
| SLC30A6    | C21orf15     |
| POLR3B     | TMPRSS11GP   |
| DLGAP5     | SECISBP2     |
| PHOSPHO2   | LAX1         |
| MYNN       | NOP56        |
| ALG10B     | LOC100507362 |
| CCDC173    | LINC00838    |
| YAE1D1     | SNORD115-44  |
| HIST2H3D   | CLECL1       |
| SLAMF7     | SLC22A31     |
| MMRN1      | MIR944       |
| DSPP       | MIR4746      |
| SNRPD2P2   | SCGN         |
| HIST1H2AA  | ADCY10       |
| MIR892B    | DEFT1P       |

|           |           |
|-----------|-----------|
| OR52K1    | DYRK4     |
| TAS2R7    | MIR604    |
| BANK1     | TENM1     |
| OR56A5    | LOC391322 |
| N6AMT1    | C7orf61   |
| LSM5      | LOC200772 |
| OXCT1     | EOGT      |
| AGBL3     | CENPQ     |
| ZNF608    | CCDC135   |
| CLUL1     | C15orf62  |
| HLA-DQB1  | MUC6      |
| SIPA1L1   | MUT       |
| IL18R1    | FKBP1A    |
| DEFB132   | MIR1260A  |
| PCDHB11   | MMP11     |
| DZANK1    | SCN7A     |
| HTATSF1P2 | MYBL2     |
| PCDHB18   | CACNA1A   |
| H2AFJ     | GAL3ST1   |
| THNSL2    | CDSN      |
| ANKRD22   | SLC6A14   |
| SZRD1     | MIR4423   |
| TRMT10A   | SMIM4     |
| COA1      | MIR626    |
| RBM7      | TRIM5     |
| RNASEL    | COX6B1    |
| MIR548AU  | BEAN1     |
| ZHX3      | R3HDML    |
| TSGA10    | SNORD45A  |
| SMYD1     | FAM175A   |
| ASB18     | LINC00523 |
| OR4N4     | SNORA20   |
| DPY30     | FLJ10038  |
| LOC286186 | NOG       |
| C2orf44   | FAM81B    |
| LRIF1     | ZNF736    |
| EMCN-IT3  | MIR487A   |
| NSUN6     | KRTAP12-4 |
| TAAR5     | NCF1C     |
| DDX58     | CD79B     |
| MIR3913-2 | SUMO3     |

|           |               |
|-----------|---------------|
| IGSF10    | FGB           |
| POLA1     | TDRP          |
| MTTP      | ERCC6L2       |
| KRTAP26-1 | SNORD53       |
| ZNF573    | SNORD115-9    |
| CD247     | NT5DC2        |
| TRDN      | FLJ14107      |
| MMS22L    | MGARP         |
| MPZL3     | LINC00330     |
| OR4N2     | SNORA6        |
| ZNF23     | IFNK          |
| ZMPSTE24  | MOB2          |
| MIR423    | MIRLET7A3     |
| EIF2S3    | LOC283177     |
| PTER      | SLC5A1        |
| TTR       | MIR1238       |
| ALOXE3    | TMEM132B      |
| OR10X1    | LOC100144595  |
| ZNF85     | SPINK4        |
| SMLR1     | HELT          |
| LARP4     | MUC12         |
| OR5A1     | PCK1          |
| CRB1      | FAM90A2P      |
| OR12D2    | SNORD113-9    |
| TCEAL8    | TMEM176A      |
| OR4C12    | PRDM14        |
| FAM5C     | MIR4480       |
| TMEM71    | TCTN2         |
| OR5AS1    | COL18A1       |
| FAM186B   | MIR192        |
| FAM229B   | SYNJ2BP-COX16 |
| OR52J3    | FM09P         |
| SNORD89   | MIR92A2       |
| FNDC7     | NEDD4         |
| UMPS      | FLJ44511      |
| COMMD9    | MTFR1         |
| HMSD      | TSHB          |
| LINC00264 | TAS2R50       |
| RPL26     | MIR548I4      |
| ABCA12    | MIR4663       |
| MIR659    | C2orf48       |

|              |              |
|--------------|--------------|
| EID1         | BVES         |
| PEX2         | RASD1        |
| PDCD10       | LOC401321    |
| ZNF45        | OR2A4        |
| MIR4644      | ITIH3        |
| CCT8         | NXPH1        |
| LOC100506035 | LOC100288255 |
| MIR3184      | CHGB         |
| METTL25      | CRISPLD2     |
| KIAA1731     | UGT2B10      |
| THAP6        | AIPL1        |
| RNASEH2B     | CCL13        |
| ARSJ         | LOC648691    |
| TUBE1        | TXK          |
| SNAR-I       | MIR4283-1    |
| CCDC59       | BTBD19       |
| OR2J3        | TMEM52       |
| VTRNA1-3     | SPINK9       |
| KCNT2        | MIR328       |
| NOP16        | UGT2B28      |
| OR10R2       | ZNF705B      |
| RAB11A       | HTR4         |
| IRAK1BP1     | C11orf94     |
| DCAF13       | SNORD116-5   |
| EXOSC8       | SNORD127     |
| PARP11       | MIR4294      |
| OR4E2        | OR2A5        |
| HBB          | EVL          |
| SSX8         | NPR3         |
| SNORD116-25  | FASTKD1      |
| SMEK3P       | PTGDS        |
| MIR5702      | SNORD115-17  |
| CSRNP3       | FAM179A      |
| C15orf43     | C10orf54     |
| OR2T10       | SNORD115-8   |
| BNIP1        | MIR4284      |
| OR52I1       | MIR3196      |
| GHRL         | ZNF83        |
| RCHY1        | TFF2         |
| FAT3         | ZNF556       |
| ARL6         | SUSD2        |

|              |              |
|--------------|--------------|
| GIMAP4       | ZNF688       |
| SLC4A10      | HAND2        |
| UTP14A       | LOC100128176 |
| KRTAP8-1     | ICAM5        |
| MIR184       | HR           |
| OR4N3P       | SNORD115-6   |
| SREK1IP1     | SGK223       |
| THEM4        | TIGIT        |
| TRAFD1       | ANAPC11      |
| KRTAP13-3    | TMEM176B     |
| BRIP1        | MMP23B       |
| ZKSCAN8      | CABP2        |
| KDM5C        | RASSF2       |
| METTL14      | PRDM16       |
| TRIQK        | LOC100128770 |
| TPTE2P6      | USP50        |
| ACTBL2       | SH3TC1       |
| PPEF2        | SEZ6L        |
| SRP19        | TMEM86B      |
| C7orf71      | CDRT15P1     |
| LOC100270804 | SYT17        |
| MIR3913-1    | DUOXA1       |
| HIGD2A       | LOC100131825 |
| GNL2         | CTSO         |
| GPM6B        | NCF2         |
| KRTAP6-1     | PRAME        |
| ACTRT1       | PARD6G-AS1   |
| CAPNS2       | NLGN2        |
| TGOLN2       | TTI1         |
| COL5A2       | LOC100505478 |
| ZNF486       | TP53AIP1     |
| HIST1H3I     | MIR3074      |
| OR2L13       | CPXCR1       |
| RNF111       | TEX21P       |
| SRSF11       | MIR378E      |
| RPA4         | CPLX1        |
| TMPRSS11F    | SNORD10      |
| CABS1        | MBD3L1       |
| OSCAR        | SNORD116-8   |
| PTHLH        | TRPV5        |
| MUC15        | RIPPLY1      |

|            |             |
|------------|-------------|
| SDHD       | DNAH12      |
| LYVE1      | MIDN        |
| TRIM26     | HTRA4       |
| OCIAD1     | MLC1        |
| CD4        | NR5A2       |
| WDR36      | SNORD115-15 |
| ZNF541     | CPT1B       |
| MIR215     | CYBA        |
| ZNF546     | SNORD35B    |
| CAT        | BTBD6       |
| FYCO1      | KIF4A       |
| C15orf37   | SFTA2       |
| SEC23B     | GDPD3       |
| FAM114A2   | PAX5        |
| THSD4      | ZNF415      |
| IFNA6      | SGCA        |
| SLC25A19   | ANKRD24     |
| LRRC40     | DEFB1       |
| RFTN2      | TPSD1       |
| MIR197     | KCNAB2      |
| OR9G9      | RPP25       |
| CENPW      | H19         |
| CDH26      | MIR5003     |
| OR4M2      | OR2G6       |
| TNFSF13B   | C5orf38     |
| DCAF4L1    | C9orf89     |
| CHCHD5     | MIR424      |
| GPR111     | SRRM5       |
| OR10A5     | OLIG3       |
| MIR32      | MIR196A1    |
| RACGAP1    | SNORD113-7  |
| MIR4473    | MIR4739     |
| NXF5       | SLC7A5P1    |
| OR1J4      | ADRA1A      |
| ERAL1      | MIR1-1      |
| BBS10      | FGL1        |
| KRT84      | ZNF625      |
| KCNAB1-AS2 | ZNF735      |
| MIR4650-2  | SNORD110    |
| MFAP3      | GOLGA2P5    |
| TMEM18     | RDH12       |



|              |              |
|--------------|--------------|
| SKA1         | FASN         |
| RPL5         | MIR4289      |
| MIR933       | TAS1R3       |
| RPSA         | EDDM3B       |
| OR2A25       | SNORD19      |
| LINC00616    | FAM212B      |
| TIMM8B       | LINC00398    |
| MMP26        | LINC00899    |
| LRG1         | SULT4A1      |
| TNN          | ARHGAP35     |
| AVPR1A       | DLX6         |
| IQCF3        | SNORD116-13  |
| KRTAP23-1    | PIAS4        |
| ZSWIM2       | MIR514B      |
| FXR1         | IL2RG        |
| POU6F2-AS1   | CALCA        |
| POLR1B       | LRRN4CL      |
| LOC100128993 | FUT7         |
| ARHGAP15     | GALNT8       |
| ZNF562       | CYP2D7P1     |
| SPOCD1       | SOX3         |
| HAVCR1P1     | CHKB-AS1     |
| ILVBL        | LOC100129083 |
| LYZL1        | TMEM240      |
| EFCAB3       | KRT14        |
| AGBL2        | RGS8         |
| OR5K4        | AUTS2        |
| KRTAP13-1    | SNORD115-39  |
| MIR1913      | OAF          |
| ZRANB1       | MBL2         |
| TRIM69       | MIR656       |
| POTEE        | LOC100129055 |
| SNORA13      | SEMA3G       |
| EBLN2        | PAQR5        |
| ESF1         | HOXB-AS1     |
| STX7         | TACC1        |
| KPNA2        | ZAP70        |
| TPI1P3       | ABCD1        |
| BTNL8        | FAM181A-AS1  |
| TRMT5        | DUOX1        |
| POLR3F       | DEFB106A     |

|              |              |
|--------------|--------------|
| CWC27        | PDE10A       |
| RGS12        | MKNK2        |
| NDUF5F5      | MIR4690      |
| TIMELESS     | SNORD115-17  |
| NUFIP2       | MIR591       |
| CLDN25       | GSTM5        |
| HRNR         | OR5C1        |
| LUZP6        | TIMP1        |
| LINC00113    | TCFL5        |
| FAM83A-AS1   | DEFB106A     |
| TMC3         | MIR876       |
| ZNF155       | FAM171A2     |
| OR4D11       | MIR4535      |
| PKD1L3       | DEFB107A     |
| MIR3151      | GPR153       |
| MIR551B      | SLC13A5      |
| LOC150568    | FBXL16       |
| CHAC2        | UBE2QL1      |
| ST5          | MIR651       |
| SLCO1A2      | SPATA31D5P   |
| C2orf42      | KLHDC7B      |
| RNLS         | LOC283332    |
| LOC100507244 | ZNF813       |
| SPATA6L      | PSG4         |
| CCNB3        | MIR208A      |
| MAP3K19      | C1orf140     |
| KRTAP4-12    | MIR4706      |
| KRT39        | SERPINA13P   |
| C2orf49      | HOXD3        |
| ZNF33B       | LOC100132078 |
| CYP2G1P      | TAF6L        |
| MIR4263      | MIR1236      |
| OR10A4       | TUSC7        |
| MIR3666      | MIR4646      |
| C1orf116     | CEND1        |
| LOC154872    | MIR4292      |
| AICDA        | CLEC12A      |
| ADH1C        | E2F7         |
| SERPINB8     | SNORD115-22  |
| EXTL2        | CHKB         |
| LOC727982    | SOHLH1       |

|              |              |
|--------------|--------------|
| GTPBP10      | TMEM257      |
| FAM106CP     | LINC00112    |
| RBM34        | PUSL1        |
| OR4F6        | IL19         |
| OR5B2        | RFPL1        |
| TCEAL3       | LOC100507300 |
| MPHOSPH10    | MIR589       |
| FAM227B      | VRTN         |
| LOC100506844 | CLCNKA       |
| MMP7         | DGKK         |
| CSRP2BP      | MIR4684      |
| SOGA3        | POTEM        |
| IL9          | A1BG         |
| SCML4        | OR5AN1       |
| PPIG         | CAV3         |
| ASH1L-AS1    | FAM133B      |
| TOR1AIP2     | ALDH1L1-AS1  |
| TOR1AIP2     | ABHD6        |
| OR4K13       | SNORD115-25  |
| PCNAP1       | GALP         |
| SCFD2        | MIR431       |
| HIST1H4K     | OR11H1       |
| DSG3         | LIME1        |
| N4BP2L2-IT2  | FOXN3-AS2    |
| ZCCHC4       | LINC00163    |
| IL15         | FZD10-AS1    |
| LINC00570    | LOC151484    |
| CDKN3        | BFAR         |
| SDF2         | PEX10        |
| MCEE         | SERPINA11    |
| LOC340515    | SNORD115-31  |
| MRPS15       | LINC00951    |
| TECTB        | MIR324       |
| SERP1        | OR2AP1       |
| TGFBR2       | CD1E         |
| PTGS2        | MIR432       |
| OR1Q1        | TRIP6        |
| NSUN3        | LINC00890    |
| RAD9B        | TBC1D9B      |
| ZNF620       | TMPRSS4-AS1  |
| LOC81691     | SNORA51      |

|              |                            |
|--------------|----------------------------|
| ASAH2        | LOC400620                  |
| LOC100506025 | P2RX1                      |
| ZNF718       | ASS1                       |
| MIR490       | MIR4763                    |
| ADAM20       | PPDPF                      |
| SNRNP27      | NCDN                       |
| A4GNT        | ZNF284                     |
| MLF1         | MIR33B                     |
| PRPF38B      | GPC3                       |
| TMED11P      | CALHM1                     |
| TAGAP        | BDH1                       |
| FGG          | ITGAL                      |
| URM1         | FAM95A                     |
| PSME3        | PTH                        |
| MIR3910-1    | SNORD23                    |
| HSD11B1      | MIR1179                    |
| ITGAD        | SYNPO                      |
| RBM19        | PRAMEF22                   |
| ADAM21       | ADAMTSL5                   |
| GZF1         | GLRA4                      |
| C11orf71     | CBX6                       |
| NAA20        | TMEM53                     |
| EXOSC3       | SEPT5-GP1BB                |
| LINC00929    | C22orf42                   |
| SUPT6H       | WISP2                      |
| FER1L6-AS1   | SNORD115-10                |
| MIR3136      | MRPL1                      |
| SCYL2        | DTX2P1-UPK3BP1-<br>PMS2P11 |
| MIR4716      | SFTPD                      |
| MIR504       | SPERT                      |
| STAT2        | LOC339240                  |
| DSE          | FAM160A2                   |
| IL17A        | MIR4710                    |
| UBR2         | MIR4451                    |
| CHURC1-FNTB  | GNAT2                      |
| NAP1L2       | PPM1A                      |
| PNO1         | TEKT4                      |
| CLEC5A       | SNORD116-12                |
| RBM26-AS1    | MIR939                     |
| HARBI1       | PCSK2                      |

|              |              |
|--------------|--------------|
| PPP1R8       | SIGLEC12     |
| OR4K14       | TLE3         |
| DEFA10P      | LGALS16      |
| LRRIQ3       | SSTR5-AS1    |
| STAR         | PRSS22       |
| IGBP1        | LOC284688    |
| CD3E         | BTN3A1       |
| USH2A        | SLFNL1       |
| MIR4650-1    | VSTM2B       |
| VPS29        | ZBTB32       |
| OXR1         | WNT2         |
| FOXR2        | IGFALS       |
| MIR548B      | SNORD115-40  |
| SLC38A6      | HOXA6        |
| OR56B1       | MIR4745      |
| FPGT-TNNI3K  | METTL12      |
| TEPP         | RPS13        |
| TTC5         | C9orf62      |
| TSPYL1       | RPRD1B       |
| C7           | LOC286083    |
| OR8U8        | HCN2         |
| KIF2C        | MYCN         |
| ABCB1        | ITM2C        |
| OR4C11       | TMTC1        |
| MANEA        | MEGF6        |
| LOC100506085 | SNORD62A     |
| PRAMEF12     | PPEF1        |
| DIEXF        | MAGED1       |
| KIAA1429     | FGFR3        |
| PCDHB9       | IZUMO4       |
| PSMD10       | OVOL1        |
| OR6C76       | NKX6-2       |
| MIR4317      | RESP18       |
| MOCS2        | FEZF1        |
| GPX5         | KCNT1        |
| AMY2A        | C1orf228     |
| KITLG        | CNKSR1       |
| RAD51AP2     | WNT6         |
| OR51L1       | TDO2         |
| DKFZp434L192 | LOC100288123 |
| RAD51AP1     | CST4         |

|              |              |
|--------------|--------------|
| C14orf178    | TREX2        |
| LINC00493    | OR8K3        |
| HMG4         | DCAF12       |
| ART4         | MIR375       |
| STK11IP      | ACSM2B       |
| MEIS1        | C11orf34     |
| CCT2         | PRR13        |
| OR2A2        | SNORD115-11  |
| NUDT6        | PSMD5        |
| MYADML       | SPOCK1       |
| SNORD54      | MIR4313      |
| SNORD116-3   | RPUSD1       |
| WDR52-AS1    | MAMDC4       |
| KIAA1009     | LRFN4        |
| MASP1        | LOC100128593 |
| MSL3P1       | HGFAC        |
| SDAD1        | CTAG2        |
| ATG4A        | MOB3A        |
| LOC100130849 | MGC12916     |
| DSG1         | TUBB2B       |
| KRTAP9-9     | C19orf81     |
| LCE1B        | A1BG-AS1     |
| SH3BGR2      | LOC100131094 |
| DUSP11       | U2AF1L4      |
| SNORD116-10  | TBC1D26      |
| GORAB        | PRSS57       |
| OR52A1       | HPCAL4       |
| CETN4P       | BRD1         |
| TJP2         | MIR1289-2    |
| NCAPD2       | DGCR5        |
| NEK11        | SMIM21       |
| WRAP53       | LOC100129034 |
| HAPLN1       | DEFB113      |
| LOC286367    | SATB2-AS1    |
| ALG14        | PRSS46       |
| KRT20        | CHST15       |
| SLC7A2       | SIX2         |
| OVCH1-AS1    | OSM          |
| LINC00837    | FNDC5        |
| SNORD90      | PRSS55       |
| MGP          | DNM1P35      |

|           |           |
|-----------|-----------|
| OR52N5    | LOC646736 |
| OR10A2    | MIRLET7B  |
| KRTAP1-5  | GMPR      |
| ZNF880    | MMEL1     |
| SPATA31E1 | NTNG2     |
| NBPF22P   | MAD2L2    |
| UOX       | ANO9      |
| LCA5      | RNU5F-1   |
| LRRCC1    | PTGES     |
| OR1E1     | MIR3621   |
| BMPR1B    | F8A1      |
| MIR4720   | LINC00632 |
| OR4M1     | APOL4     |
| MIR101-1  | WBSCR22   |
| MIR323A   | SNORA57   |
| OR52R1    | VIPR2     |
| MFSD8     | ASIC2     |
| TMEM212   | SLC18A3   |
| DHX33     | LOC400558 |
| GRIA1     | MDK       |
| UBQLN3    | GIPC3     |
| OR8H1     | ASPHD1    |
| DHRS9     | LYPD8     |
| ATP13A4   | BTK       |
| COPS8     | CCDC54    |
| PNPT1     | BARHL2    |
| TMEM126A  | C17orf74  |
| ARMC2     | SNORD65   |
| ZNF271    | MIR216B   |
| MIR4727   | CBS       |
| SIAH3     | FLJ36777  |
| PRDM2     | CNTN4     |
| LOC550643 | CCDC114   |
| OR2A12    | NSUN4     |
| ADH1B     | OSTCP1    |
| NNAT      | NAT16     |
| CHRN3     | PNMA2     |
| MMADHC    | CITED1    |
| OTUD6A    | LCN10     |
| PCM1      | MICALL2   |
| C9orf153  | MFF       |

|           |              |
|-----------|--------------|
| MNS1      | CEBPA        |
| ATG13     | PGM5-AS1     |
| OR4N5     | LOC285768    |
| RFC2      | SNORA70      |
| DUSP12    | PRDM6        |
| LOC285501 | PRKAR1B      |
| ZSCAN30   | GRM3         |
| CLDN17    | CP           |
| BTD       | DUOX2        |
| HIST1H4A  | PSAPL1       |
| OR4D5     | CSNK1G2-AS1  |
| ECD       | ONECUT1      |
| ST13      | CCDC154      |
| ASTE1     | ZBTB48       |
| C13orf35  | CEBPA-AS1    |
| NEUROD4   | PLEKHD1      |
| SUGT1     | SOX8         |
| HBD       | SNORD114-29  |
| DEFB125   | SNORD115-30  |
| F5        | LOC283731    |
| OR5F1     | SOCS2-AS1    |
| LRRC52    | LCN6         |
| DNASE2B   | GJD4         |
| SCLT1     | SLFNL1-AS1   |
| NOBOX     | MOCOS        |
| AREL1     | WWC2         |
| IGSF6     | LOC100130238 |
| CXorf56   | GRIN2A       |
| MUC7      | COL19A1      |
| PARP6     | SNORA65      |
| CT64      | SLC5A9       |
| LINC00920 | PIRT         |
| TAAR8     | TAGLN2       |
| CHD1      | SNORD115-5   |
| OR2T34    | MIR511-2     |
| LINC00889 | H2AFB3       |
| DKK2      | MIR3605      |
| MIR5579   | MIR210HG     |
| PCDHB3    | MED15        |
| LINC00207 | GRIK3        |
| OR4A16    | BCORL1       |



|           |              |
|-----------|--------------|
| OR10A7    | PATE1        |
| SPIN3     | RAX          |
| GALK2     | CCDC153      |
| CTSL1     | MIR26B       |
| MRPS9     | AATK         |
| FAM149A   | FGF8         |
| LOC284933 | LOC100130899 |
| TUBAL3    | SPATA8       |
| EQTN      | FOXB2        |
| TRAPPC13  | SPATA8-AS1   |
| TRAPPC13  | MIR4656      |
| BCO2      | TGM6         |
| YME1L1    | MIR409       |
| TRIM23    | ANKRD35      |
| HIST1H2BA | FAM57B       |
| MIR29C    | PANK4        |
| SPANXN2   | DNAJC30      |
| PSMA1     | MIR411       |
| GNG5      | CACNA1H      |
| TAS2R8    | DOK7         |
| UBR1      | LHX5         |
| PPWD1     | KLHL17       |
| IL13RA2   | DGCR11       |
| ARPP21    | CTRB2        |
| ZSCAN16   | NPAS1        |
| AKR1C6P   | C1orf233     |
| TFF3      | SNORD115-33  |
| SAAL1     | MIR3183      |
| NTS       | LRRC56       |
| OR8G2     | YWHAE        |
| PMS2P5    | RNASE11      |
| ZNF317    | TCAP         |
| NBPF15    | PIP5K1B      |
| NUDT9     | ZSWIM1       |
| NAV3      | PABPN1L      |
| OR8I2     | EGFR-AS1     |
| MIR941-3  | STUB1        |
| PAAF1     | FLI1         |
| GARNL3    | DNASE1       |
| RIT2      | FAM132A      |
| CHMP4C    | MYLPF        |

|              |              |
|--------------|--------------|
| OR6C74       | KLHL34       |
| ZNF404       | SNORA71C     |
| FUT10        | MIR412       |
| TRAPPC6B     | SIX5         |
| LAMTOR5-AS1  | ZNF141       |
| TAF9B        | MIR1185-1    |
| TMEM92       | DLGAP4       |
| HIST1H1B     | ZNF180       |
| P2RY13       | OPN1SW       |
| OR52N2       | SNORD115-4   |
| LOC100129316 | INSM1        |
| MBL1P        | ACAP1        |
| MMP8         | MDGA1        |
| SPRY1        | MIR4641      |
| FCF1         | ZNF701       |
| KRR1         | MIR4640      |
| OR10G4       | CCDC36       |
| LIN7C        | MIR4760      |
| CATSPER1     | TBKBP1       |
| MC4R         | IL21R        |
| CYSLTR1      | EPHA10       |
| ZW10         | GRAMD4       |
| SNORA75      | MYCNOS       |
| FAM149B1     | AQP7P3       |
| HFE          | CRHR1        |
| C14orf1      | THBD         |
| C15orf52     | RPS6KA4      |
| OR52M1       | DOK3         |
| FAM13A       | MIR210       |
| EBNA1BP2     | MIR3977      |
| MIR4476      | TPPP2        |
| MIR5087      | CECR3        |
| OR2T1        | GPR132       |
| ECT2         | MIR4261      |
| TPRG1-AS2    | UBE2J2       |
| PLCB4        | AMH          |
| LOC643837    | LOC100133920 |
| TLK1         | SCARNA12     |
| LRRC69       | HS6ST2-AS1   |
| CENPK        | PRSS3P2      |
| ADAMTS9-AS2  | PRSS27       |

|                       |              |
|-----------------------|--------------|
| LINC00672             | MIR410       |
| OR5J2                 | BRSK2        |
| ZNF615                | ACHE         |
| SAMD9L                | LOC440905    |
| OR52I2                | ALKBH6       |
| SUMO1P1               | PNMA3        |
| CWC25                 | DPP7         |
| HTR3A                 | FOX11        |
| CDH18                 | TRIM71       |
| VSIG1                 | MPV17L       |
| MMP16                 | IL36G        |
| MAGEB16               | MIR124-3     |
| CCR4                  | RNU6-31P     |
| CTH                   | MIR369       |
| LRRC37A3              | EFCAB6-AS1   |
| TTLL5                 | MIR5699      |
| ANKRD62P1-<br>PARP4P3 | LYPD2        |
| PRB4                  | LOC286297    |
| DAPL1                 | SNORD115-11  |
| LINC00710             | WWC2-AS2     |
| LINC00332             | FFAR1        |
| POU5F1P4              | FUOM         |
| H3F3C                 | LANCL3       |
| FAM115C               | GPATCH4      |
| PCDHB2                | ZNF350       |
| ANGPT2                | LOC100169752 |
| PRKAG1                | NBR1         |
| C21orf37              | BGN          |
| RFESD                 | LOC100133461 |
| LOC253573             | KIF26A       |
| SPRR2C                | KRT73        |
| USP47                 | LOC100130348 |
| BEND7                 | ASGR2        |
| MIR4759               | TMEM132E     |
| MIR892A               | CDCP2        |
| PELP1                 | CCDC116      |
| HES1                  | FCN2         |
| XCL2                  | GP2          |
| ZNF33A                | NIPAL3       |
| CYP20A1               | SMOC1        |

|              |             |
|--------------|-------------|
| EYA1         | MAZ         |
| LOC100294145 | LINC00696   |
| C9orf53      | NOTUM       |
| RGPD3        | SOX11       |
| C10orf90     | MIR299      |
| DEFA5        | EHD1        |
| CELA2B       | LOC285484   |
| OR4B1        | MIR1914     |
| SPINK7       | ARHGEF16    |
| ANKS4B       | POU3F1      |
| NMS          | SEZ6L2      |
| KRTAP3-3     | FAM107A     |
| ASB9         | DMKN        |
| HEPH         | NACC2       |
| AP1G2        | FGD3        |
| SYT4         | MIR1250     |
| HACL1        | KCNN2       |
| RMST         | FZD10       |
| STPG2        | C9orf173    |
| ATF2         | TNFRSF18    |
| ERV3-1       | SLC35G3     |
| STAG3L2      | SOX21       |
| WDR31        | MIR382      |
| KLHL4        | CCL3L1      |
| NPY1R        | PPARA       |
| RSRC1        | PCP2        |
| LRR1         | TNFRSF6B    |
| IBSP         | GFPT2       |
| MIR30E       | C20orf27    |
| INIP         | MSANTD1     |
| MIR1205      | IFNL3       |
| EXOGEN       | VEGF        |
| CCDC86       | ZCCHC2      |
| GSTA7P       | BCL6B       |
| LOC100379224 | C20orf201   |
| STEAP1       | PRR22       |
| OR4K15       | SNORD115-38 |
| TRIM6-TRIM34 | ADRA2B      |
| LOC284100    | GNG13       |
| OR5M3        | DMRTC2      |
| ZNF107       | PXDN        |

|            |          |
|------------|----------|
| WBP5       | SLC11A1  |
| FER        | SLC6A2   |
| EAF2       | TYMP     |
| MIR3910-2  | MIR3689A |
| RPA2       | BATF2    |
| PLCL2      | MIR3689F |
| MIR335     |          |
| DIRAS3     |          |
| CRHR1-IT1  |          |
| TTC27      |          |
| TCEAL1     |          |
| SNORD109B  |          |
| MGC16142   |          |
| KLHL2      |          |
| TMEM184C   |          |
| OR5K3      |          |
| SUMO4      |          |
| SNORD114-7 |          |
| PCCA-AS1   |          |
| MBIP       |          |
| PIP5K1P1   |          |
| CLCN4      |          |
| ERI2       |          |
| TMEM59     |          |
| CCDC28A    |          |
| LOC389043  |          |
| PLCH1      |          |
| PPBPP2     |          |
| PGBD1      |          |
| PLAC1L     |          |
| ACPP       |          |
| NDUFA9     |          |
| OR51A7     |          |
| LPCAT2     |          |
| TRIM68     |          |
| LOC284661  |          |
| OR13F1     |          |
| GADD45GIP1 |          |
| FETUB      |          |
| KRTAP15-1  |          |
| PRKAB1     |          |

|             |  |
|-------------|--|
| CBR4        |  |
| TSPAN19     |  |
| TOMM7       |  |
| ESCO2       |  |
| DBT         |  |
| OSBPL10-AS1 |  |
| SLC7A8      |  |
| B4GALT3     |  |
| GLYAT       |  |
| WDR33       |  |
| MBNL3       |  |
| LOC401463   |  |
| NXF3        |  |
| SPANXN4     |  |
| LOC646329   |  |
| PPP2R2D     |  |
| CCDC58      |  |
| MIR138-1    |  |
| SCFD1       |  |
| NUBPL       |  |
| OR6C3       |  |
| TRAF3IP3    |  |
| MDM1        |  |
| OR10V2P     |  |
| LINC00457   |  |
| OR5AK2      |  |
| AQP4-AS1    |  |
| C2orf47     |  |
| RPL13AP3    |  |
| OR2A14      |  |
| GPR65       |  |
| HMGA1P7     |  |
| MIPOL1      |  |
| MAP2K4P1    |  |
| RPLP0P2     |  |
| PIGK        |  |
| ZNF90       |  |
| PDE12       |  |
| AADA2L2     |  |
| SLC35B3     |  |
| OR52D1      |  |

|              |  |
|--------------|--|
| ST6GALNAC1   |  |
| CDH9         |  |
| CAPS2        |  |
| LRR1Q1       |  |
| BMX          |  |
| LOC101559451 |  |
| LOC285593    |  |
| SNRPD1       |  |
| MIR758       |  |
| FAM205B      |  |
| HLA-DPB1     |  |
| NKTR         |  |
| CCDC65       |  |
| CEACAM6      |  |
| TXNIP        |  |
| C6orf58      |  |
| PIK3CG       |  |
| ARPC5        |  |
| LINC00312    |  |
| NSRP1        |  |
| LINC00944    |  |
| IFNA8        |  |
| KRTAP6-2     |  |
| NLRP9        |  |
| OR6X1        |  |
| POLM         |  |
| SDE2         |  |
| BCKDHA       |  |
| SHFM1        |  |
| SPRR1B       |  |
| MIR3976      |  |
| ITGB3BP      |  |
| DRAM2        |  |
| FERMT1       |  |
| OTOL1        |  |
| IFNA22P      |  |
| FAM115A      |  |
| LINC00174    |  |
| TSPAN12      |  |
| CTXN3        |  |
| MIR3198-1    |  |

|              |  |
|--------------|--|
| AEBP2        |  |
| C2orf15      |  |
| PHACTR4      |  |
| OR4C15       |  |
| NUDCD3       |  |
| LOC644669    |  |
| LOC100505989 |  |
| PLK4         |  |
| KCNH7        |  |
| RNU6-66P     |  |
| GPR156       |  |
| RAET1K       |  |
| SPATA31D1    |  |
| LINC00347    |  |
| CCDC148-AS1  |  |
| MYH1         |  |
| OR6M1        |  |
| IQCF5        |  |
| MIR4464      |  |
| LINC00478    |  |
| KRTAP19-2    |  |
| HMP19        |  |
| PCDHB14      |  |
| ZNF100       |  |
| EXOC4        |  |
| WBP4         |  |
| CNBD1        |  |
| FANCL        |  |
| HSPA8        |  |
| LOC100505549 |  |
| ZNF257       |  |
| NOX5         |  |
| OR5R1        |  |
| LOC100289673 |  |
| LIPN         |  |
| MIR542       |  |
| CNTF         |  |
| ARMCX3       |  |
| OTUD6B       |  |
| LOC100131067 |  |
| LOC644649    |  |



|              |  |
|--------------|--|
| OR2L5        |  |
| BDNF-AS      |  |
| TRIM21       |  |
| GZMK         |  |
| KCNE4        |  |
| C1D          |  |
| MARK2        |  |
| SPATA31C2    |  |
| LOC550112    |  |
| IYD          |  |
| MIR4306      |  |
| HCG23        |  |
| RHOXF2B      |  |
| PMFBP1       |  |
| MYSM1        |  |
| SKIV2L       |  |
| ALKBH3       |  |
| EDAR         |  |
| TECTA        |  |
| ZNF432       |  |
| ARL6IP5      |  |
| MYO16        |  |
| CPO          |  |
| GPR183       |  |
| LOC400654    |  |
| ADAMTSL1     |  |
| TMEM45A      |  |
| LOC100507066 |  |
| KRTAP4-11    |  |
| IQCB1        |  |
| SLC25A21     |  |
| OR2B3        |  |
| GCM1         |  |
| ZNF589       |  |
| ACMSD        |  |
| LRRTM4       |  |
| FANCG        |  |
| KPRP         |  |
| PRSS16       |  |
| RPL21        |  |
| HSD52        |  |

|           |  |
|-----------|--|
| HIST1H3H  |  |
| LINC00559 |  |
| LINC00865 |  |
| LINC00115 |  |
| SS18L2    |  |
| LOC650226 |  |
| EMP3      |  |
| NCKAP1L   |  |
| SPRR2E    |  |
| GINS1     |  |
| MIR4639   |  |
| OR51B6    |  |
| HBBP1     |  |
| RSU1P2    |  |
| VTCN1     |  |
| WFDC8     |  |
| DRG1      |  |
| OR5B17    |  |
| ALDH1B1   |  |
| MSS51     |  |
| MIR873    |  |
| PIGB      |  |
| RNF144B   |  |
| MRPL22    |  |
| LRRC18    |  |
| MIR206    |  |
| CNTNAP4   |  |
| KRT77     |  |
| MIR4643   |  |
| FAM47B    |  |
| LINC00348 |  |
| OXSM      |  |
| PTGFR     |  |
| MIR4295   |  |
| ASPN      |  |
| SNORD66   |  |
| C14orf23  |  |
| UPP2      |  |
| BORA      |  |
| MIR4327   |  |
| KLRF2     |  |

|              |  |
|--------------|--|
| MTRNR2L4     |  |
| TAT          |  |
| ATAD3C       |  |
| GABRA1       |  |
| GCA          |  |
| BUB1B        |  |
| C11orf82     |  |
| MIR3671      |  |
| TENM2        |  |
| LOC100287010 |  |
| NEIL3        |  |
| PCDH18       |  |
| HHLA3        |  |
| ZCCHC9       |  |
| CDKL2        |  |
| PCBP3        |  |
| GAL3ST4      |  |
| SPRR2A       |  |
| TSACC        |  |
| SNORA79      |  |
| SNW1         |  |
| GCNT1        |  |
| CAPN14       |  |
| LOC100507462 |  |
| CNGA1        |  |
| CDKAL1       |  |
| ZNF121       |  |
| OTOR         |  |
| FKSG29       |  |
| EFCAB7       |  |
| C12orf40     |  |
| CAV1         |  |
| NDST4        |  |
| PPP1R1C      |  |
| MKRN3        |  |
| CADM2-AS2    |  |
| LOC550113    |  |
| ANKRD13C     |  |
| CTLA4        |  |
| TXNDC9       |  |
| ZNF536       |  |

|            |  |
|------------|--|
| PAK3       |  |
| SNORA70F   |  |
| SPRR2D     |  |
| ASB15      |  |
| ANGPTL1    |  |
| DOPEY2     |  |
| DOPEY1     |  |
| AQP9       |  |
| ZCWPW2     |  |
| MIR5582    |  |
| LOC652276  |  |
| HUS1       |  |
| TBC1D19    |  |
| OR2L3      |  |
| ATP8B4     |  |
| EXOSC9     |  |
| SLC39A12   |  |
| KBTBD3     |  |
| GTF2A2     |  |
| SMPX       |  |
| NDUFA4     |  |
| DISC2      |  |
| COX7C      |  |
| SMTNL1     |  |
| UBAP1L     |  |
| MAP2       |  |
| TJAP1      |  |
| OR5M11     |  |
| MYH4       |  |
| MIR5681B   |  |
| RNF146     |  |
| CCDC7      |  |
| OR4A5      |  |
| OR51T1     |  |
| C6orf7     |  |
| LINC00379  |  |
| ZRANB2-AS2 |  |
| SLC9B2     |  |
| LAMTOR5    |  |
| SMIM9      |  |
| MARK2P9    |  |

|              |  |
|--------------|--|
| LRP10        |  |
| DFFA         |  |
| RBKS         |  |
| CLK2P        |  |
| IL36RN       |  |
| EPN1         |  |
| UBC          |  |
| ZC2HC1B      |  |
| PNISR        |  |
| MIR4804      |  |
| CENPP        |  |
| DEFB110      |  |
| BCAP29       |  |
| MIR5681A     |  |
| GRIK2        |  |
| OR1D5        |  |
| NLRP8        |  |
| IFITM4P      |  |
| ALDOB        |  |
| NOSTRIN      |  |
| MIR3622A     |  |
| LINC00359    |  |
| LINC00160    |  |
| MIR4272      |  |
| NARS         |  |
| LINC00343    |  |
| CXCR2        |  |
| CD1B         |  |
| EIF3H        |  |
| ARHGAP25     |  |
| GYS2         |  |
| ALG13        |  |
| EIF2A        |  |
| MIR3134      |  |
| MIR320C1     |  |
| TSPAN13      |  |
| CACNA2D3-AS1 |  |
| UGT8         |  |
| EIF2B2       |  |
| MIR3921      |  |
| ZNF225       |  |

|              |  |
|--------------|--|
| DDX18        |  |
| SCARNA5      |  |
| TYW5         |  |
| GTSF1L       |  |
| C8B          |  |
| SNORA41      |  |
| SUCLA2       |  |
| C22orf31     |  |
| CETN2        |  |
| MT1X         |  |
| VSIG4        |  |
| RABL3        |  |
| RNU6-34P     |  |
| TPD52L1      |  |
| IFNL2        |  |
| LOC100288814 |  |
| KRT222       |  |
| LOC100506207 |  |
| QRSL1        |  |
| MIR181B2     |  |
| C6orf52      |  |
| RBM26        |  |
| PNLIPRP1     |  |
| BLOC1S1      |  |
| DHDDS        |  |
| RTN4IP1      |  |
| IL21         |  |
| RNPC3        |  |
| EMC1         |  |
| LINC00670    |  |
| KRTAP10-6    |  |
| SZT2         |  |
| RSL1D1       |  |
| SPACA7       |  |
| NPSR1-AS1    |  |
| CSTL1        |  |
| RUNX1-IT1    |  |
| MOB3B        |  |
| MIR1911      |  |
| MIR3653      |  |
| BCAS3        |  |

|              |  |
|--------------|--|
| SNORA40      |  |
| C6orf163     |  |
| SNORD2       |  |
| SLC15A2      |  |
| CD74         |  |
| KRTAP20-2    |  |
| OR4A47       |  |
| TFAM         |  |
| FLJ33581     |  |
| PRDX6        |  |
| SPANXN3      |  |
| VWC2L        |  |
| LOC100128531 |  |
| ATP8A1       |  |
| TEDDM1       |  |
| WNT8B        |  |
| RGS3         |  |
| RIMBP2       |  |
| TBC1D21      |  |
| EHF          |  |
| PDCD6IP      |  |
| TIMM8A       |  |
| HOXB3        |  |
| FSIP1        |  |
| SULT2A1      |  |
| VNN1         |  |
| SEL1L2       |  |
| C3orf14      |  |
| TGM4         |  |
| ANP32C       |  |
| MPZL2        |  |
| IFNA16       |  |
| KCNQ5-AS1    |  |
| IER3         |  |
| ZNF311       |  |
| SNORD32B     |  |
| LOC100505495 |  |
| SMC2         |  |
| LIPI         |  |
| OR511        |  |
| LRGUK        |  |

|             |  |
|-------------|--|
| CDHR3       |  |
| KRTAP9-4    |  |
| HIGD1C      |  |
| OR14I1      |  |
| OR5B12      |  |
| CLEC1A      |  |
| OR2AG1      |  |
| MURC        |  |
| NRXN3       |  |
| MRTO4       |  |
| SNORD114-6  |  |
| KIAA1644    |  |
| MTPAP       |  |
| MRPL42P5    |  |
| C5          |  |
| KIAA1024L   |  |
| CCDC155     |  |
| FABP1       |  |
| C6orf118    |  |
| OR10J1      |  |
| COX10       |  |
| MIR889      |  |
| GARS        |  |
| RPS26P11    |  |
| CALCRL      |  |
| CASP12      |  |
| ORC3        |  |
| NKIRAS2     |  |
| MRPL47      |  |
| GABRG1      |  |
| MYH13       |  |
| XPNPEP3     |  |
| ZNF32-AS2   |  |
| SNORD116-19 |  |
| SNORD115-11 |  |
| OR10G8      |  |
| CCL8        |  |
| MIR196A2    |  |
| ZNF208      |  |
| LOC149373   |  |
| SCN2B       |  |



|              |  |
|--------------|--|
| KRTAP5-11    |  |
| ZRANB2       |  |
| TAF9         |  |
| TAF9         |  |
| CYP2B6       |  |
| LOC653712    |  |
| MBOAT4       |  |
| MIR5089      |  |
| LDLRAD4-AS1  |  |
| AQP8         |  |
| PACRG-AS1    |  |
| EIF1B-AS1    |  |
| OR9Q2        |  |
| MIR613       |  |
| OR5E1P       |  |
| CYP4A22      |  |
| TNIP3        |  |
| PYDC2        |  |
| TAAR9        |  |
| DNAH14       |  |
| TAS2R10      |  |
| LINC00626    |  |
| CTSL3P       |  |
| HTR2A        |  |
| OR8J3        |  |
| NUGGC        |  |
| SPATA5       |  |
| KIRREL3      |  |
| SPATA12      |  |
| GYP A        |  |
| SLC8A1       |  |
| C10orf12     |  |
| C16orf97     |  |
| SNAPC1       |  |
| IFNA7        |  |
| LOC100129138 |  |
| NOL8         |  |
| MIR4743      |  |
| FER1L6       |  |
| SLITRK1      |  |
| SERPINB7     |  |

|              |  |
|--------------|--|
| LINC00615    |  |
| ATF7IP       |  |
| PRKG2        |  |
| ZNF774       |  |
| C17orf112    |  |
| TMEM167A     |  |
| SIGLEC15     |  |
| MIR1200      |  |
| CASP9        |  |
| C12orf66     |  |
| ATAD1        |  |
| SLC17A6      |  |
| LOC339568    |  |
| MIR29A       |  |
| DYNLT3       |  |
| STYK1        |  |
| ENTPD1       |  |
| ATP5J2-PTCD1 |  |
| XRCC4        |  |
| GPR22        |  |
| MIR4474      |  |
| VBP1         |  |
| MYH3         |  |
| EIF1B        |  |
| OR51E2       |  |
| MTF2         |  |
| PNMA1        |  |
| NAGK         |  |
| SERPINA6     |  |
| FEM1C        |  |
| RD3          |  |
| GPHB5        |  |
| MST1         |  |
| UBA6         |  |
| OR2D3        |  |
| LOC642361    |  |
| LCE3E        |  |
| MIR4471      |  |
| MSH4         |  |
| PPAPDC1B     |  |
| ANP32AP1     |  |

|              |  |
|--------------|--|
| LOC339505    |  |
| C11orf49     |  |
| SEMG2        |  |
| LRRC10       |  |
| PNLIP        |  |
| LRRC17       |  |
| SETD4        |  |
| SUPT3H       |  |
| MGAT4C       |  |
| KLHL28       |  |
| TBC1D23      |  |
| ZNF738       |  |
| LOC100128361 |  |
| C14orf105    |  |
| RRN3P3       |  |
| ZNF597       |  |
| LOC151475    |  |
| MED8         |  |
| BBS1         |  |
| MAP1B        |  |
| PCDHB17      |  |
| POLE4        |  |
| ZNF300       |  |
| MIR592       |  |
| LOC100500773 |  |
| LOC100129213 |  |
| HCG18        |  |
| HSPB3        |  |
| CD2          |  |
| NLGN4X       |  |
| MLKL         |  |
| SNORD67      |  |
| OR51G2       |  |
| TREM1        |  |
| SNORD20      |  |
| SNHG3        |  |
| CALD1        |  |
| OR13G1       |  |
| MIR4417      |  |
| FANCF        |  |
| MIR3938      |  |

|             |  |
|-------------|--|
| SNORD116-18 |  |
| NAALADL2    |  |
| SHROOM3     |  |
| TENM3       |  |
| OR2D2       |  |
| MIR4446     |  |
| METTL21EP   |  |
| NR1H4       |  |
| CAP1        |  |
| LINC00423   |  |
| RGS13       |  |
| WFDC11      |  |
| CYMP        |  |
| COX10-AS1   |  |
| ZNF214      |  |
| ADH1A       |  |
| UBE2U       |  |
| OR7E24      |  |
| OR5D14      |  |
| ERCC6L      |  |
| PITX2       |  |
| SMAD5-AS1   |  |
| RBBP9       |  |
| LOC1720     |  |
| NF1P2       |  |
| ARMCX6      |  |
| ESD         |  |
| CXCL6       |  |
| PAX9        |  |
| SNORA74A    |  |
| DNAJC27     |  |
| UBA1        |  |
| CALCR       |  |
| DNAJC5B     |  |
| WDR5B       |  |
| SLC15A5     |  |
| CLDN8       |  |
| CSN1S2BP    |  |
| LILRB2      |  |
| FLJ45974    |  |
| PRRC1       |  |

|              |  |
|--------------|--|
| OR5D16       |  |
| AZU1         |  |
| OR2Z1        |  |
| OR2G2        |  |
| MED11        |  |
| PRRG1        |  |
| LOC100506497 |  |
| LOC286442    |  |
| NDUFB5       |  |
| SLC6A15      |  |
| SCRG1        |  |
| MIR3129      |  |
| NDNF         |  |
| LOC283440    |  |
| LINC00381    |  |
| MIR340       |  |
| NLRP11       |  |
| WDR65        |  |
| CEP44        |  |
| RPL24        |  |
| HTR3B        |  |
| ATP5EP2      |  |
| PABPC1P2     |  |
| MIR1912      |  |
| MAPKAPK5-AS1 |  |
| TLR1         |  |
| LOC100507632 |  |
| RARS2        |  |
| TPRG1        |  |
| MIRLET7G     |  |
| MIR181A1     |  |
| DCLK3        |  |
| FCRL3        |  |
| ZFP57        |  |
| LENEP        |  |
| NLRP4        |  |
| SLC41A2      |  |
| RBMX2        |  |
| HIST1H3C     |  |
| BTN2A1       |  |
| MIR4536-1    |  |

|              |  |
|--------------|--|
| ZNF770       |  |
| KPNA5        |  |
| PGK2         |  |
| GDPD1        |  |
| ZNF407       |  |
| LCE6A        |  |
| LOC100130451 |  |
| HIST1H2BN    |  |
| TMPRSS11BNL  |  |
| POGZ         |  |
| ELAVL4       |  |
| NELL2        |  |
| CLEC3A       |  |
| CLCA3P       |  |
| PRAMEF8      |  |
| IFI44L       |  |
| MIR3622B     |  |
| SPATA9       |  |
| OR8D1        |  |
| PCDHA12      |  |
| SCARNA7      |  |
| PFKFB1       |  |
| STAP1        |  |
| SNORA50      |  |
| CHORDC1      |  |
| MNDA         |  |
| RNF7         |  |
| GPRC5A       |  |
| ARHGEF33     |  |
| ORC5         |  |
| MIR4288      |  |
| ARHGAP31     |  |
| TTC3P1       |  |
| C12orf74     |  |
| RBL1         |  |
| PLS1         |  |
| DNAJC27-AS1  |  |
| FOXRED1      |  |
| DCAF13P3     |  |
| OR6C65       |  |
| SUCLG1       |  |

|              |  |
|--------------|--|
| TNFSF4       |  |
| TMEM141      |  |
| C16orf3      |  |
| TMED10       |  |
| CDRT15P2     |  |
| WDR61        |  |
| DBI          |  |
| FCAR         |  |
| NF1P2        |  |
| OR8S1        |  |
| OR5H6        |  |
| LOC339788    |  |
| SFTA1P       |  |
| SLC17A8      |  |
| PCDH9-AS3    |  |
| IFNA5        |  |
| ITPKB        |  |
| HYAL1        |  |
| LMOD2        |  |
| COX7A2       |  |
| MIR5586      |  |
| STYX         |  |
| AWAT2        |  |
| HK2          |  |
| MARS2        |  |
| SAMSN1       |  |
| B3GALT2      |  |
| FABP6        |  |
| LINC00883    |  |
| DIAPH3       |  |
| MIR3646      |  |
| CFLAR        |  |
| GPR18        |  |
| MAGI1-AS1    |  |
| UNC93A       |  |
| ANP32D       |  |
| SAR1A        |  |
| LINC00208    |  |
| WDR17        |  |
| LOC100129345 |  |
| SPINT4       |  |

|             |  |
|-------------|--|
| MIR500B     |  |
| MIR1253     |  |
| ZNF207      |  |
| OR2L1P      |  |
| DNAH3       |  |
| POLR2K      |  |
| DDX3X       |  |
| TXNDC8      |  |
| DBF4B       |  |
| SPIN2A      |  |
| ARRDC3-AS1  |  |
| TIE1        |  |
| OR5A2       |  |
| GNAS        |  |
| MIR488      |  |
| BCL2A1      |  |
| MIR3145     |  |
| POTEB       |  |
| C6orf70     |  |
| MZT1        |  |
| UBASH3A     |  |
| MIR4434     |  |
| DLGAP1-AS5  |  |
| DDX27       |  |
| KLHL12      |  |
| PRKACB      |  |
| PIK3CB      |  |
| SERTAD4-AS1 |  |
| DLD         |  |
| OMA1        |  |
| MIR486      |  |
| GABRA6      |  |
| ALDH8A1     |  |
| FABP9       |  |
| TPH1        |  |
| EXOSC5      |  |
| PBOV1       |  |
| FOXP2       |  |
| GOLGA6L7P   |  |
| COL8A1      |  |
| CD1C        |  |



|                |  |
|----------------|--|
| OR10W1         |  |
| ZNF675         |  |
| FCRL2          |  |
| OR52E6         |  |
| SNORD116-1     |  |
| LIPJ           |  |
| CCBP2          |  |
| ACSM4          |  |
| RERGL          |  |
| LOC100289511   |  |
| RPS15AP10      |  |
| EBLN1          |  |
| MIR99A         |  |
| DPM3           |  |
| MIR23B         |  |
| RPAP1          |  |
| ACN9           |  |
| NAIP           |  |
| CFB            |  |
| LINC00851      |  |
| TAF1B          |  |
| MKRN9P         |  |
| MIR4319        |  |
| LNX1           |  |
| SPATA19        |  |
| CYP3A7-CYP3AP1 |  |
| LOC150935      |  |
| TAS2R60        |  |
| MMP12          |  |
| ADAM7          |  |
| SNORD114-23    |  |
| IQCF2          |  |
| BLNK           |  |
| MIR653         |  |
| MIR3152        |  |
| CCRL1          |  |
| PPIP5K2        |  |
| DLEU7-AS1      |  |
| SLC14A1        |  |
| KRTAP5-4       |  |
| PRPS2          |  |

|                 |  |
|-----------------|--|
| FAN1            |  |
| VN1R5           |  |
| CD19            |  |
| PLA2G2F         |  |
| OR4C16          |  |
| MIR128-2        |  |
| RASSF9          |  |
| SPAM1           |  |
| NYAP2           |  |
| ATXN7L3B        |  |
| DKFZP434K028    |  |
| ZNF711          |  |
| NDUFAF1         |  |
| KLHL9           |  |
| ENPP3           |  |
| SUPT20HL1       |  |
| ZNF280B         |  |
| IMPG1           |  |
| KIAA1107        |  |
| PLA2G12A        |  |
| GAP43           |  |
| LOC100506834    |  |
| CHMP1B          |  |
| MYT1L           |  |
| SNORD115-11     |  |
| OSTN            |  |
| HADH            |  |
| PTP4A1          |  |
| MED4-AS1        |  |
| CCDC140         |  |
| ZBBX            |  |
| AURKAPS1        |  |
| TRPC7           |  |
| GPR113          |  |
| DHX32           |  |
| MIR221          |  |
| RNASEK-C17orf49 |  |
| FAM65C          |  |
| PATE4           |  |
| ASB17           |  |
| AMPD2           |  |

|             |  |
|-------------|--|
| NOX4        |  |
| RHOH        |  |
| CD5         |  |
| MIR1279     |  |
| PHEX-AS1    |  |
| MIR54802    |  |
| ZNF32-AS1   |  |
| ABCA13      |  |
| TFB1M       |  |
| COLEC10     |  |
| MIR1197     |  |
| CLU1        |  |
| INE1        |  |
| LOC91450    |  |
| MIR627      |  |
| MIR384      |  |
| SNORD115-27 |  |
| PLEKHA5     |  |
| AGTR1       |  |
| LOC285889   |  |
| KRT1        |  |
| CPA6        |  |
| CEACAM3     |  |
| C10orf129   |  |
| MIR4500     |  |
| LGALS8      |  |
| DDX20       |  |
| BDKRB1      |  |
| CYP4A11     |  |
| MIR4531     |  |
| OR8G1       |  |
| TXLNB       |  |
| PRB3        |  |
| SOSTDC1     |  |
| OR7D4       |  |
| ZNF850      |  |
| CNOT2       |  |
| ANXA9       |  |
| CLIC2       |  |
| KRTAP19-8   |  |
| CLDN9       |  |

|              |  |
|--------------|--|
| TCTE3        |  |
| ACYP1        |  |
| C17orf105    |  |
| CCDC74B-AS1  |  |
| FCGR2A       |  |
| LINC00488    |  |
| MIR105-2     |  |
| LINC00907    |  |
| SMARCAD1     |  |
| DAAM1        |  |
| TNFRSF10A    |  |
| SAMD12-AS1   |  |
| IL24         |  |
| MTUS2        |  |
| SRPR         |  |
| C7orf72      |  |
| NPS          |  |
| CTSL1P8      |  |
| MIR448       |  |
| LOC100507577 |  |
| KIAA0087     |  |
| NBAS         |  |
| MIR4744      |  |
| LOC146481    |  |
| SNORD114-28  |  |
| SNORD51      |  |
| LINC00323    |  |
| NRG4         |  |
| LINC00476    |  |
| MIR4529      |  |
| LOC340074    |  |
| MIR3162      |  |
| SPICE1       |  |
| CRBN         |  |
| ANGPTL7      |  |
| ZNF676       |  |
| MIR5188      |  |
| LCN15        |  |
| PAR1         |  |
| OR51A4       |  |
| SNORD9       |  |

|             |  |
|-------------|--|
| TPK1        |  |
| SUGT1P1     |  |
| OR4D6       |  |
| SKOR1       |  |
| F9          |  |
| SP140L      |  |
| SNORA26     |  |
| GPATCH3     |  |
| MUSK        |  |
| RPL23P8     |  |
| NOC3L       |  |
| GLTSCR1L    |  |
| FAM26D      |  |
| LINC00238   |  |
| SCOC        |  |
| CEACAM21    |  |
| MIR764      |  |
| VPS37A      |  |
| MIR4778     |  |
| MIR676      |  |
| ADAM20P1    |  |
| SPATA7      |  |
| TIAM2       |  |
| LINC00474   |  |
| LINC00548   |  |
| SLC37A3     |  |
| LRRC37A11P  |  |
| NEMF        |  |
| MIR3924     |  |
| C7orf76     |  |
| MIR181B1    |  |
| TUBB1       |  |
| PHYHD1      |  |
| LRRC19      |  |
| PSMB1       |  |
| POTEF       |  |
| AQP4        |  |
| KRTAP12-3   |  |
| LINC00857   |  |
| SNORD115-28 |  |
| KAAG1       |  |

|              |  |
|--------------|--|
| ACBD6        |  |
| LINC00460    |  |
| PRDM1        |  |
| CNOT7        |  |
| SNORD114-24  |  |
| CCRL2        |  |
| ADAM28       |  |
| WDR44        |  |
| IL5          |  |
| OCRL         |  |
| GPR119       |  |
| PICK1        |  |
| LOC494127    |  |
| TGM7         |  |
| UBB          |  |
| TBC1D28      |  |
| PPY2         |  |
| MIR581       |  |
| CCDC147      |  |
| LOC389641    |  |
| IFNA17       |  |
| SAMD7        |  |
| TKTL1        |  |
| RPUSD3       |  |
| MIR4273      |  |
| ACSM2A       |  |
| C1QTNF6      |  |
| SCARNA6      |  |
| S100B        |  |
| B3GNT5       |  |
| ZNF645       |  |
| LOC100506393 |  |
| MIR891A      |  |
| GM2A         |  |
| MIR3619      |  |
| CERKL        |  |
| GMNN         |  |
| MIR888       |  |
| MEPE         |  |
| C19orf18     |  |
| LINC00159    |  |

|              |  |
|--------------|--|
| RGMB-AS1     |  |
| ACVR1B       |  |
| MIR450B      |  |
| GTF2E1       |  |
| PPP1R2P9     |  |
| DLEU2L       |  |
| OR4F15       |  |
| ATP2C1       |  |
| LOC285441    |  |
| LOC285441    |  |
| TNFSF15      |  |
| LGALS1       |  |
| ARG1         |  |
| FBXW2        |  |
| MIR3978      |  |
| LOC100506136 |  |
| MIR4449      |  |
| KIR3DL3      |  |
| UQCRFS1      |  |
| AKR1B10      |  |
| RPL23AP7     |  |
| BRE          |  |
| GNL3         |  |
| SETDB1       |  |
| SNORD28      |  |
| CTAGE5       |  |
| OR2L2        |  |
| HIST1H1T     |  |
| FAM225B      |  |
| MIR600HG     |  |
| CFHR3        |  |
| COL3A1       |  |
| RAB9A        |  |
| CYP39A1      |  |
| PRSS58       |  |
| GPC5-AS1     |  |
| CYP1A2       |  |
| LOC100873065 |  |
| CSTA         |  |
| CCL22        |  |
| ALKBH4       |  |

|              |  |
|--------------|--|
| CCIN         |  |
| AGTR2        |  |
| GPR63        |  |
| LOC100505658 |  |
| MIR302B      |  |
| LOC100288842 |  |
| SNORD114-13  |  |
| SLC25A35     |  |
| GPR151       |  |
| PPBP         |  |
| TYK2         |  |
| NINJ2        |  |
| SCIN         |  |
| TSPAN16      |  |
| PDE1A        |  |
| MYO3B        |  |
| SNORA62      |  |
| LINC00293    |  |
| LOC100132781 |  |
| KCNU1        |  |
| SPTBN5       |  |
| COL10A1      |  |
| TMEM242      |  |
| MRPL54       |  |
| MIR30C1      |  |
| ATP1A4       |  |
| VPS39        |  |
| TMEM27       |  |
| ORAOV1       |  |
| OR5AU1       |  |
| EPHX2        |  |
| OR3A1        |  |
| SCARNA10     |  |
| GFRAL        |  |
| RNF123       |  |
| RPF1         |  |
| C19orf80     |  |
| DQX1         |  |
| PDE6A        |  |
| TMBIM6       |  |
| MYH8         |  |



|              |  |
|--------------|--|
| SNORD115-7   |  |
| SNORA16B     |  |
| MIR1206      |  |
| ILDR1        |  |
| RFX3         |  |
| FAM45B       |  |
| BTAF1        |  |
| SH3GLB2      |  |
| DEFB109P1    |  |
| C11orf63     |  |
| ITIH4        |  |
| TMEM44-AS1   |  |
| CXCR2P1      |  |
| SAMSN1-AS1   |  |
| DNAH17       |  |
| LINC00502    |  |
| NTRK3-AS1    |  |
| OR5T3        |  |
| CCR1         |  |
| FMO2         |  |
| ERO1LB       |  |
| EFTUD1       |  |
| CSF3R        |  |
| TSPYL6       |  |
| LILRB3       |  |
| FAM101A      |  |
| LZTS1-AS1    |  |
| PDSS2        |  |
| LOC100129534 |  |
| ISLR2        |  |
| APOBEC4      |  |
| TPTE2P1      |  |
| MIR4791      |  |
| NAP1L3       |  |
| SNORD19B     |  |
| MIR5007      |  |
| ALDOA        |  |
| RPS7P5       |  |
| ATP6V1G1     |  |
| OR11H6       |  |
| KIR3DL2      |  |

|           |  |
|-----------|--|
| CLRN1-AS1 |  |
| ATL1      |  |
| OR1F2P    |  |
| PLA2G2E   |  |
| LINC00351 |  |
| FAM110A   |  |
| ZNF841    |  |
| MIR3193   |  |
| N4BP2L2   |  |
| CATSPERB  |  |
| MIR4762   |  |
| C17orf47  |  |
| TCHHL1    |  |
| NLRP14    |  |
| OR4S2     |  |
| LRCH3     |  |
| LALBA     |  |
| NDUFB8    |  |
| ZNF98     |  |
| IDH3G     |  |
| FAM24A    |  |
| OR6K2     |  |
| FOXR1     |  |
| GCG       |  |
| C20orf78  |  |
| GLS       |  |
| METTL20   |  |
| PRM3      |  |
| OR51B4    |  |
| MIR3662   |  |
| CES1P2    |  |
| MRGPRX2   |  |
| TLR7      |  |
| SCARNA9   |  |
| OR3A3     |  |
| SHBG      |  |
| CASKIN1   |  |
| OR1D4     |  |
| FAM71F2   |  |
| SLC10A1   |  |
| OR7C1     |  |

|              |  |
|--------------|--|
| MYO1H        |  |
| KIF11        |  |
| RFPL1S       |  |
| MIR450A1     |  |
| AGAP11       |  |
| SPO11        |  |
| ZMYND11      |  |
| MIR323B      |  |
| LOC649395    |  |
| KEL          |  |
| GP5          |  |
| LOC100288846 |  |
| MIR744       |  |
| GPR37        |  |
| CDC20B       |  |
| LRRC3C       |  |
| OR7G1        |  |
| SCNN1B       |  |
| MAP10        |  |
| PCP4         |  |
| LOC100289650 |  |
| LCA5L        |  |
| TOB2P1       |  |
| MAGI2        |  |
| SCN3A        |  |
| C4orf3       |  |
| GPR56        |  |
| OR8B12       |  |
| LINC00433    |  |
| SPINK5       |  |
| LINC00870    |  |
| GAPDHS       |  |
| MGC34034     |  |
| KCNA10       |  |
| ARMCX4       |  |
| SCRN2        |  |
| MSR1         |  |
| POLB         |  |
| LOC100129636 |  |
| ANXA2P1      |  |
| HIST1H1E     |  |

|               |  |
|---------------|--|
| FUZ           |  |
| HTR3E         |  |
| LOC729950     |  |
| CRYZ          |  |
| S1PR4         |  |
| NAE1          |  |
| GIMAP1-GIMAP5 |  |
| TRPV3         |  |
| FAM83A        |  |
| COL6A6        |  |
| SLC35E3       |  |
| MIR4669       |  |
| BMS1P1        |  |
| GSTO2         |  |
| PLVAP         |  |
| WDR75         |  |
| MIR3677       |  |
| C22orf46      |  |
| PSMC6         |  |
| CYP2W1        |  |
| SGK2          |  |
| MIR376B       |  |
| NMUR2         |  |
| OR13C4        |  |
| B3GALT5       |  |
| KLHDC4        |  |
| MIR4697HG     |  |
| HHAT          |  |
| SYCE2         |  |
| LRIT3         |  |
| GPRC5C        |  |
| CEMP1         |  |
| MIR4301       |  |
| MIR199A1      |  |
| HEMK1         |  |
| MIR583        |  |
| LRRTM2        |  |
| MIR4699       |  |
| YWHAQ         |  |
| RNF133        |  |
| CHIAP2        |  |

|             |  |
|-------------|--|
| ARHGEF3-AS1 |  |
| SNORD63     |  |
| MIR4264     |  |
| RAB30       |  |
| ANKRD37     |  |
| SIGLEC10    |  |
| TARDBP      |  |
| GPR115      |  |
| SALL3       |  |
| SNORD115-17 |  |
| MIR450A2    |  |
| MIR593      |  |
| ADCYAP1     |  |
| HNRNPU-AS1  |  |
| TGFBR1      |  |
| MIR331      |  |
| FAM26E      |  |
| UTRN        |  |
| PITPNM2     |  |
| S100A7L2    |  |
| HIST1H2AJ   |  |
| HS3ST1      |  |
| SUN1        |  |
| MIR1973     |  |
| TSIX        |  |
| MIR539      |  |
| KLRG1       |  |
| CRCT1       |  |
| LOC646268   |  |
| WFDC13      |  |
| OR5K1       |  |
| MIR135A2    |  |
| CLEC10A     |  |
| LCE2D       |  |
| ZNF577      |  |
| MIR10B      |  |
| C16orf90    |  |
| FPR2        |  |
| AA06        |  |
| MTMR8       |  |
| MIR654      |  |

|              |  |
|--------------|--|
| LINC00906    |  |
| MTRNR2L3     |  |
| WFDC10A      |  |
| ATP13A5      |  |
| ZMAT4        |  |
| PXDNL        |  |
| LOC441666    |  |
| SIGLECL1     |  |
| LOC285000    |  |
| LOC100289473 |  |
| ZFYVE20      |  |
| OR2M2        |  |
| C14orf180    |  |
| FUT2         |  |
| SELL         |  |
| LNX1-AS2     |  |
| ZNF876P      |  |
| TNFAIP8L2    |  |
| LOC100507346 |  |
| MIRLET7A2    |  |
| PIPSL        |  |
| TCF20        |  |
| MIR655       |  |
| FAM83B       |  |
| KIF4B        |  |
| PSMB11       |  |
| C9orf170     |  |
| KIF24        |  |
| LOC100130357 |  |
| MIR3607      |  |
| SPATA13-AS1  |  |
| OR11L1       |  |
| CYP2C19      |  |
| MIR3131      |  |
| MIR378C      |  |
| F2RL2        |  |
| LCT          |  |
| PIN4         |  |
| RASA4CP      |  |
| C3orf79      |  |
| LINC00304    |  |

|              |  |
|--------------|--|
| SNORD116-15  |  |
| LOC100287834 |  |
| LAIR1        |  |
| LINC00251    |  |
| NXPE2        |  |
| RILPL2       |  |
| MAD2L1       |  |
| UNC45A       |  |
| HRH4         |  |
| SNORA8       |  |
| SNORD30      |  |
| TRIM49B      |  |
| XIRP2        |  |
| CALU         |  |
| CYCSP52      |  |
| STH          |  |
| MIR4694      |  |
| LOC158435    |  |
| ROS1         |  |
| METTL21C     |  |
| FAAH         |  |
| SLC25A27     |  |
| LRRN4        |  |
| CBX5         |  |
| MTRF1        |  |
| CDH19        |  |
| FABP2        |  |
| RSPO2        |  |
| SLC47A2      |  |
| SNORD97      |  |
| XIAP         |  |
| IL23R        |  |
| SIRPD        |  |
| RNF216-IT1   |  |
| IL12RB2      |  |
| MIR4776-2    |  |
| KRTAP20-3    |  |
| MIR4776-1    |  |
| XCR1         |  |
| NXF4         |  |
| SNORD115-32  |  |

|              |  |
|--------------|--|
| DPF2         |  |
| OR5D18       |  |
| DYNAP        |  |
| MIR2355      |  |
| TRO          |  |
| PYGM         |  |
| TEK          |  |
| MIR548AC     |  |
| CD1D         |  |
| FCN1         |  |
| MIR376A2     |  |
| PRICKLE2-AS3 |  |
| PDGFA        |  |
| CHST4        |  |
| LINC00277    |  |
| CHST9        |  |
| SGCB         |  |
| TEX33        |  |
| ABCC12       |  |
| MIR891B      |  |
| CSMD3        |  |
| LOC285740    |  |
| MYOF         |  |
| MIR5704      |  |
| TFEC         |  |
| DBH          |  |
| COG2         |  |
| LOC100505875 |  |
| RNASE12      |  |
| FAM47E       |  |
| FMO1         |  |
| STXBP5L      |  |
| CDH20        |  |
| CFTR         |  |
| C14orf183    |  |
| SMIM2-IT1    |  |
| CCDC141      |  |
| PRSS53       |  |
| TSSC1        |  |
| RARB         |  |
| MYLK4        |  |



|           |  |
|-----------|--|
| MIR320D2  |  |
| PZP       |  |
| FLJ22447  |  |
| S100Z     |  |
| FDXACB1   |  |
| LOC286370 |  |
| MIR4705   |  |
| CLSTN2    |  |
| RNASE1    |  |
| CYP21A2   |  |
| LCP1      |  |
| IDO2      |  |
| ERP27     |  |
| SLC18A1   |  |
| MRAP      |  |
| PIGR      |  |
| MYL5      |  |
| MIR4282   |  |
| ABCC6P1   |  |
| SNORD21   |  |
| MIR20B    |  |
| LINC00880 |  |
| MIR3975   |  |
| C10orf71  |  |
| DMC1      |  |
| SNORA56   |  |
| LOC649330 |  |
| CABIN1    |  |
| PIK3C2B   |  |
| DHX58     |  |
| C7orf65   |  |
| PLD4      |  |
| TOP3B     |  |
| CRNKL1    |  |
| FAM179B   |  |
| HCG4B     |  |
| MIR554    |  |
| ZNF134    |  |
| ENTPD5    |  |
| GMNC      |  |
| CPA2      |  |

|           |  |
|-----------|--|
| TECRL     |  |
| CCDC38    |  |
| BTN2A2    |  |
| CXCL13    |  |
| TEX28     |  |
| RABL2B    |  |
| PILRB     |  |
| FPR1      |  |
| CYP2C9    |  |
| LINC00538 |  |
| MAGT1     |  |
| HMGCLL1   |  |
| MIR4441   |  |
| NYX       |  |
| ADRA2C    |  |

**Supp. Table 2.** The 23 ENCODE datasets used for regulatory factor binding sites in Figure 6 and Supp. Fig. 3 (2011).

| Regulatory factor | ENCODE dataset                                                    |
|-------------------|-------------------------------------------------------------------|
| ATF3              | wgEncodeAwgTfbsHaibA549Atf3V0422111Etoh02UniPk.narrowPeak         |
| BCL3              | wgEncodeAwgTfbsHaibA549Bcl3V0422111Etoh02UniPk.narrowPeak         |
| BHLHE40           | wgEncodeAwgTfbsSydhA549Bhlhe40IggrabUniPk.narrowPeak              |
| c-Myc             | wgEncodeSydhTfbsA549CmyclggrabPk.narrowPeak                       |
| CEBP1             | wgEncodeSydhTfbsA549CebpblggrabPk.narrowPeak                      |
| CREB1             | wgEncodeAwgTfbsHaibA549Creb1sc240V0416102Dex100nmUniPk.narrowPeak |
| CTCF              | wgEncodeAwgTfbsHaibA549Ctcfsc5916Pcr1xEtoh02UniPk.narrowPeak      |
| ELF1              | wgEncodeAwgTfbsHaibA549Elf1V0422111Etoh02UniPk.narrowPeak         |
| ETS1              | wgEncodeAwgTfbsHaibA549Ets1V0422111Etoh02UniPk.narrowPeak         |
| FOSL2             | wgEncodeAwgTfbsHaibA549Fosl2V0422111Etoh02UniPk.narrowPeak        |
| FOXA1             | wgEncodeAwgTfbsHaibA549Foxa1V0416102Dex100nmUniPk.narrowPeak      |
| GABPA             | wgEncodeAwgTfbsHaibA549Gabpv0422111Etoh02UniPk.narrowPeak         |
| MAX               | wgEncodeAwgTfbsSydhA549MaxlggrabUniPk.narrowPeak                  |
| NRSF              | wgEncodeAwgTfbsHaibA549Nrsfv0422111Etoh02UniPk.narrowPeak         |
| p300              | wgEncodeAwgTfbsHaibA549P300V0422111Etoh02UniPk.narrowPeak         |
| Pol II            | wgEncodeAwgTfbsHaibA549Pol2Pcr2xEtoh02UniPk.narrowPeak            |
| RAD21             | encode/wgEncodeAwgTfbsSydhA549Rad21IggrabUniPk.narrowPeak         |
| SIN3A             | wgEncodeAwgTfbsHaibA549Sin3ak20V0422111Etoh02UniPk.narrowPeak     |
| SIX5              | wgEncodeAwgTfbsHaibA549Six5V0422111Etoh02UniPk.narrowPeak         |
| TAF1              | wgEncodeAwgTfbsHaibA549Taf1V0422111Etoh02UniPk.narrowPeak         |
| TCF               | wgEncodeAwgTfbsHaibA549Tcf12V0422111Etoh02UniPk.narrowPeak        |
| YY1               | wgEncodeAwgTfbsHaibA549Yy1cV0422111Etoh02UniPk.narrowPeak         |
| ZBTB33            | wgEncodeAwgTfbsHaibA549Zbtb33V0422111Etoh02UniPk.narrowPeak       |

**Supp. Table 3.** Global correlation values for iSLK.219 cell line 0 hour with the 6, 12, 24, and 48 hours post doxycycline treatment and corresponding timepoints for control iSLK.219 cells.

|                                  |      | Doxycycline-treated timepoints |            |            |            |            | Corresponding control timepoints |            |            |            |  |
|----------------------------------|------|--------------------------------|------------|------------|------------|------------|----------------------------------|------------|------------|------------|--|
|                                  |      | 0HR                            | 6HR        | 12HR       | 24HR       | 48HR       | 6HR                              | 12HR       | 24HR       | 48HR       |  |
|                                  | 0HR  | 1                              | 0.97489037 | 0.96960797 | 0.84697906 | 0.93947887 | 0.97564998                       | 0.96205344 | 0.9352317  | 0.95823614 |  |
| Doxycycline-treated timepoints   | 6HR  | 0.97489037                     | 1          | 0.97405963 | 0.84593782 | 0.93957052 | 0.97913783                       | 0.9611058  | 0.93228324 | 0.95685885 |  |
|                                  | 12HR | 0.96960797                     | 0.97405963 | 1          | 0.87916155 | 0.96029981 | 0.97984215                       | 0.96192273 | 0.95514304 | 0.9647646  |  |
|                                  | 24HR | 0.84697906                     | 0.84593782 | 0.87916155 | 1          | 0.90944492 | 0.86380829                       | 0.85352642 | 0.90773688 | 0.89952851 |  |
|                                  | 48HR | 0.93947887                     | 0.93957052 | 0.96029981 | 0.90944492 | 1          | 0.95119799                       | 0.93854611 | 0.95728881 | 0.96055785 |  |
| Corresponding control timepoints | 6HR  | 0.97564998                     | 0.97913783 | 0.97984215 | 0.86380829 | 0.95119799 | 1                                | 0.96637524 | 0.94921343 | 0.96528891 |  |
|                                  | 12HR | 0.96205344                     | 0.9611058  | 0.96192273 | 0.85352642 | 0.93854611 | 0.96637524                       | 1          | 0.93897712 | 0.95275119 |  |
|                                  | 24HR | 0.9352317                      | 0.93228324 | 0.95514304 | 0.90773688 | 0.95728881 | 0.94921343                       | 0.93897712 | 1          | 0.95906846 |  |
|                                  | 48HR | 0.95823614                     | 0.95685885 | 0.9647646  | 0.89952851 | 0.96055785 | 0.96528891                       | 0.95275119 | 0.95906846 | 1          |  |

**Supp. Table 4.** Number of raw reads, aligned reads to HG19 genome, on- and off-target reads for 0, 6, 12, 24, and 48 hours for iSLK.219 doxycycline treated and corresponding timepoints for control iSLK.219 cells.

|                                  |      | Raw reads  | Aligned reads | On-target reads | Off-target reads | Percent on-target reads | Percent off-target reads |
|----------------------------------|------|------------|---------------|-----------------|------------------|-------------------------|--------------------------|
| Doxycycline treated timepoints   | 6HR  | 28,818,960 | 26,345,075    | 24,253,601      | 2,091,474        | 92.06%                  | 7.94%                    |
|                                  | 12HR | 21,946,955 | 20,121,373    | 18,463,933      | 1,657,440        | 91.76%                  | 8.24%                    |
|                                  | 24HR | 8,531,342  | 7,797,542     | 7,159,867       | 637,675          | 91.82%                  | 8.18%                    |
|                                  | 48HR | 16,165,852 | 14,737,424    | 13,397,681      | 1,339,743        | 90.91%                  | 9.09%                    |
|                                  | 0HR  | 20,458,718 | 18,658,368    | 17,228,108      | 1,430,260        | 92.33%                  | 7.67%                    |
| Corresponding control timepoints | 6HR  | 30,184,600 | 27,620,979    | 25,368,509      | 2,252,470        | 91.85%                  | 8.15%                    |
|                                  | 12HR | 13,357,715 | 12,139,566    | 11,120,008      | 1,019,558        | 91.60%                  | 8.40%                    |
|                                  | 24HR | 9,053,492  | 8,278,466     | 7,569,039       | 709,427          | 91.43%                  | 8.57%                    |
|                                  | 48HR | 15,389,683 | 14,037,853    | 12,855,496      | 1,182,357        | 91.58%                  | 8.42%                    |
|                                  | 0HR  |            |               |                 |                  |                         |                          |
